# Supplementary material for: Acid Catalyzed Formation of C–C and C–S Bonds via Excited State Proton Transfer
Source: PubMed Central journal article supplement (PMC6480163; doi:10.3390/molecules24071318), 2019-04-03
Supplement: molecules-24-01318-s001.pdf [file molecules-24-01318-s001.pdf]

## Supplementary information

# Acid catalyzed formation of C-C and C-S bonds via Excited State Proton Transfer

Alessandro Strada,<sup>1</sup> Mattia Fredditori,<sup>1,2</sup> Giuseppe Zanoni,\*<sup>1</sup>  
Stefano Protti<sup>2\*</sup>

*1 Department of Chemistry, University of Pavia, Viale Taramelli, 10-27100 Pavia, Italy*

*2 PhotoGreen Lab, Department of Chemistry, University of Pavia, Viale Taramelli 10, 27100 Pavia. Correspondence: stefano.protti@unipv.it; gz@unipv.it*

### Table of Contents.

(9 PAGES)

|                                                                                       |    |
|---------------------------------------------------------------------------------------|----|
| 1. <sup>1</sup> H and <sup>13</sup> C-NMR spectra of the synthesized compounds        | S2 |
| 2. UV-Visible spectra of compounds <b>PA1</b> , <b>PA2</b> , <b>1</b> and <b>4a</b> . | S7 |

# 1. <sup>1</sup>H and <sup>13</sup>C-NMR spectra of the synthesized compounds.

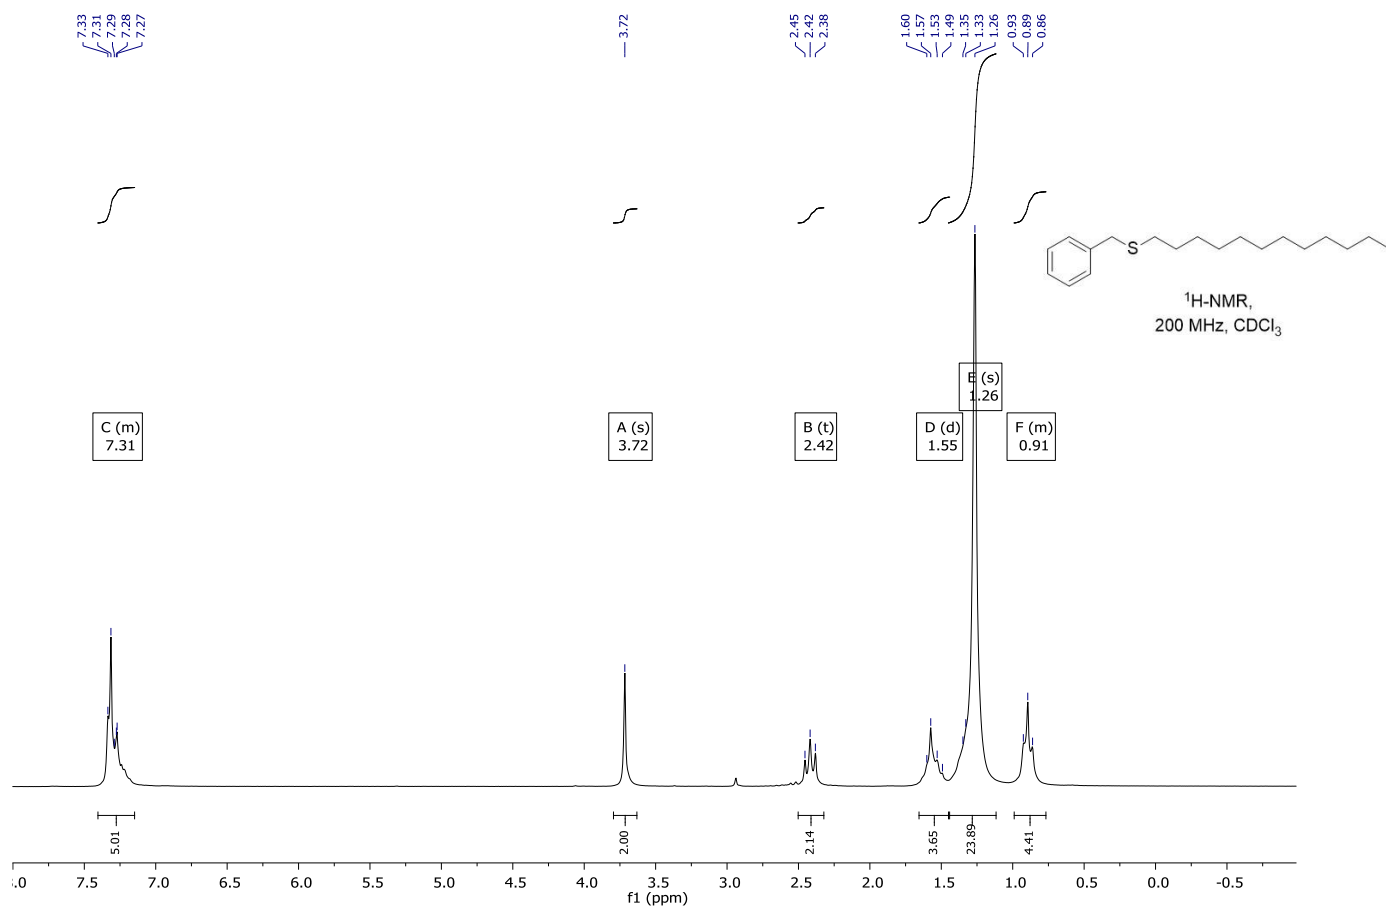

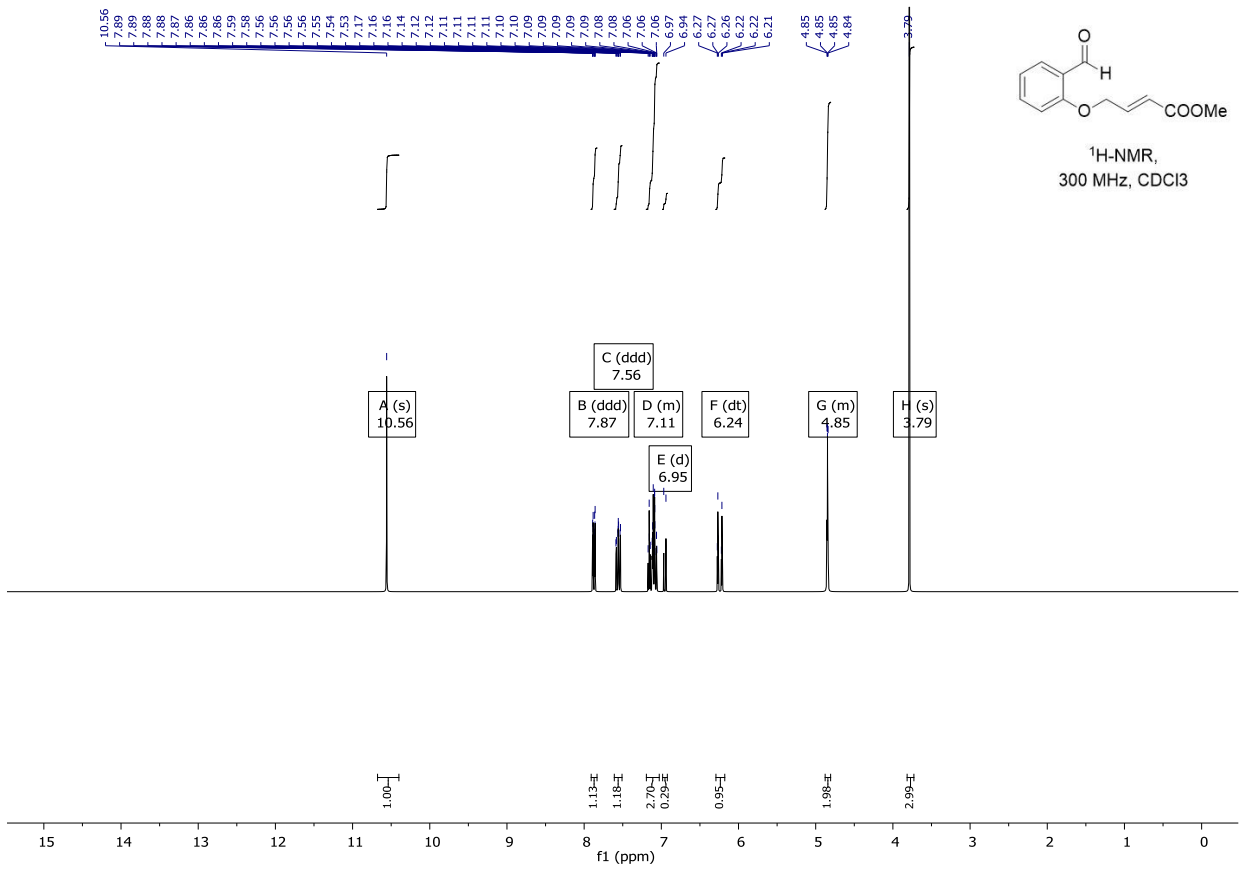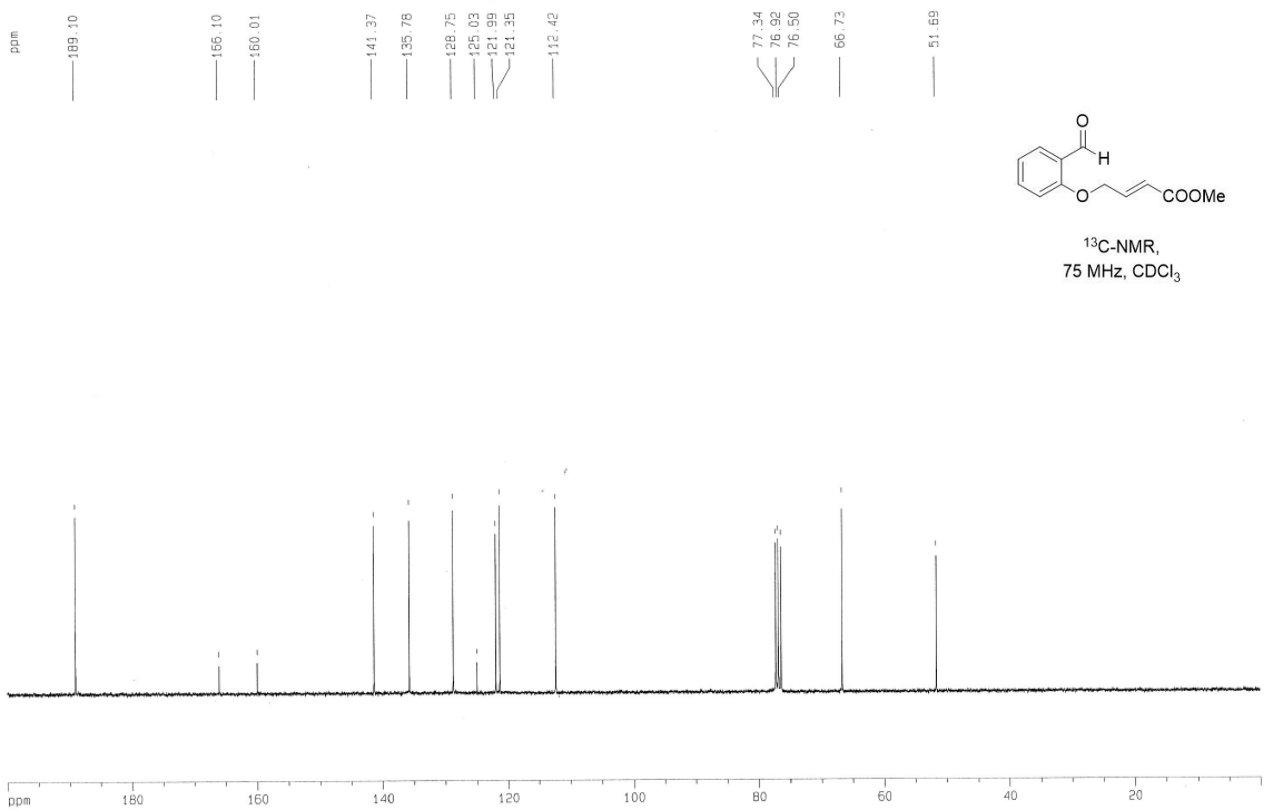

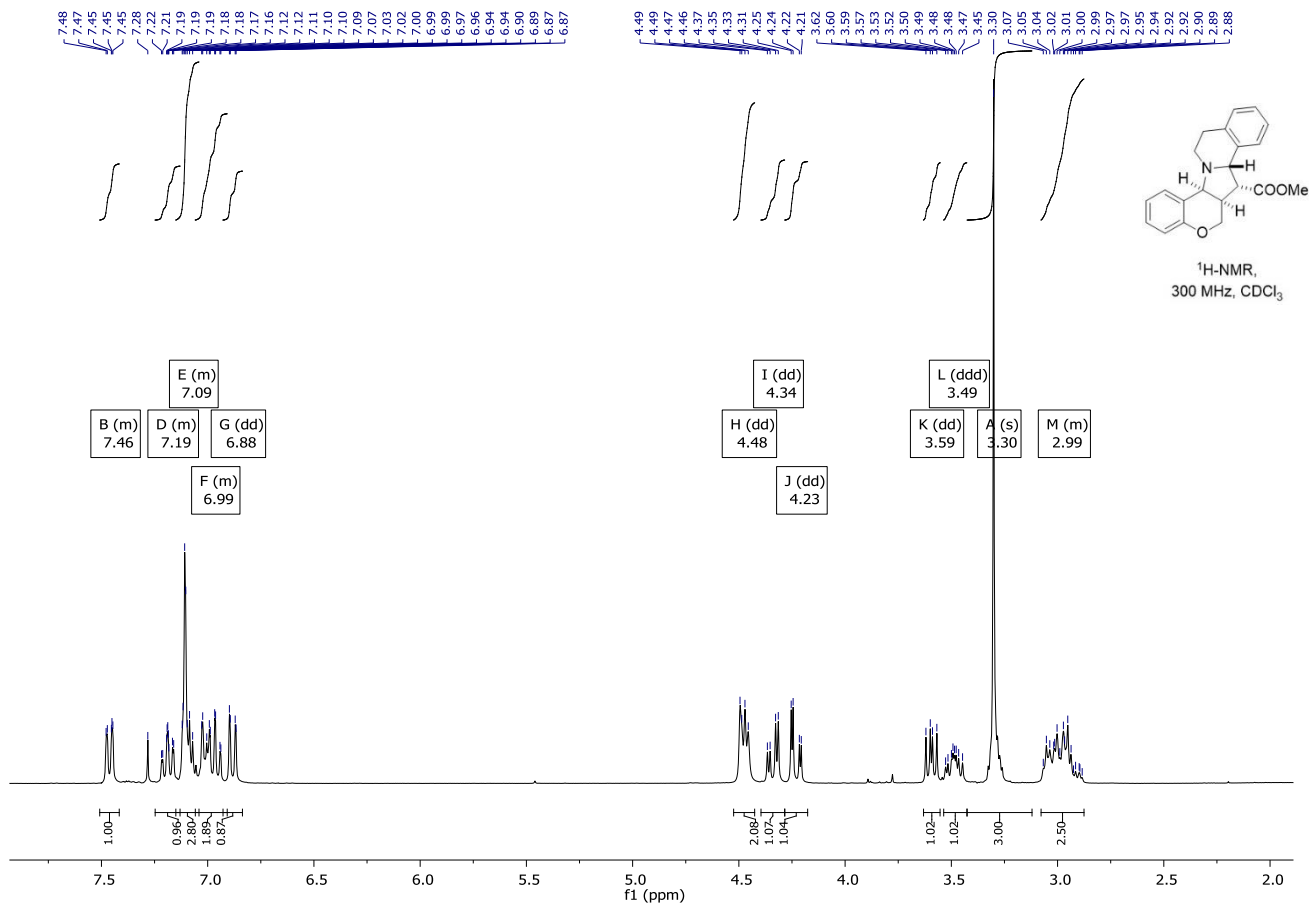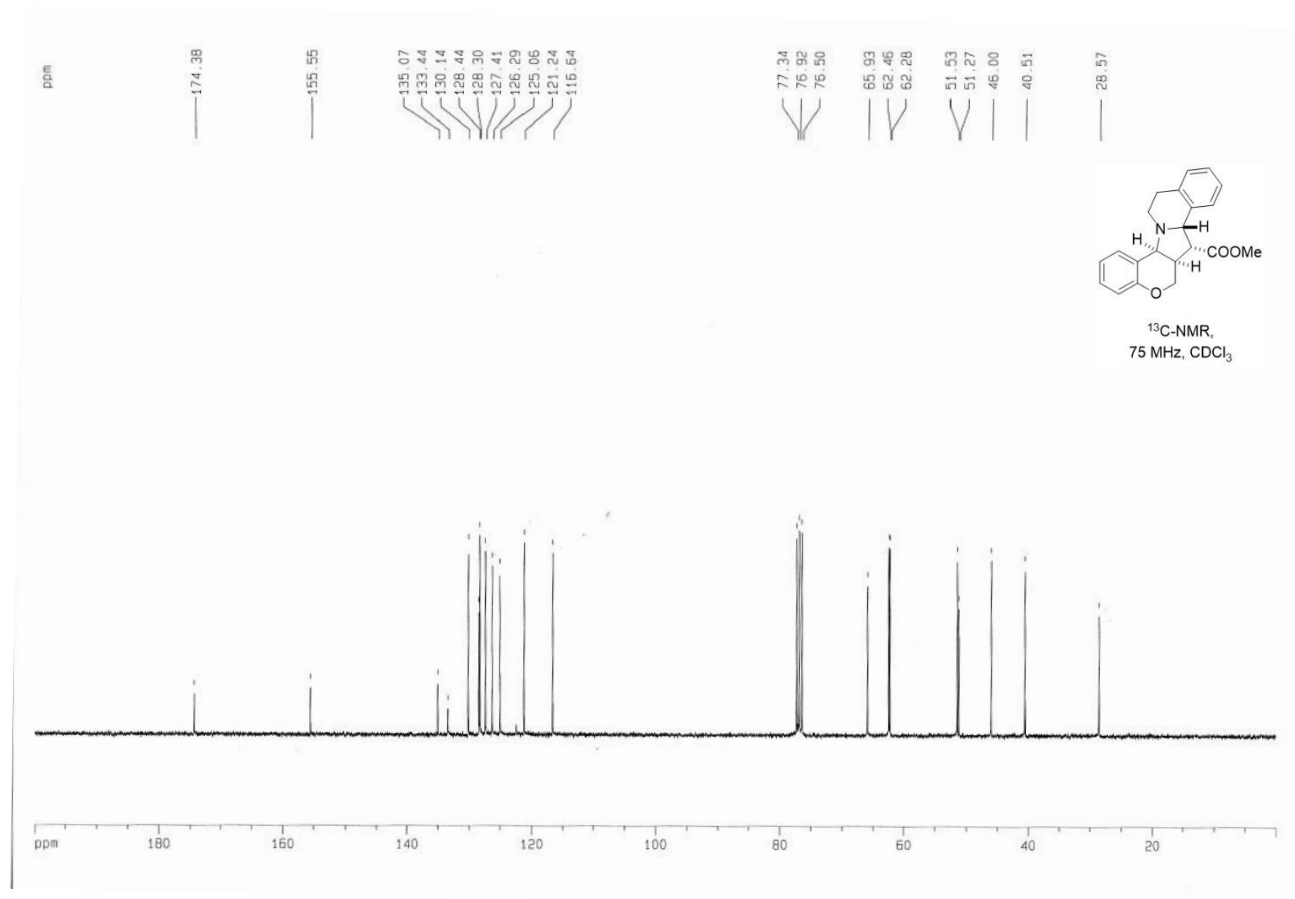

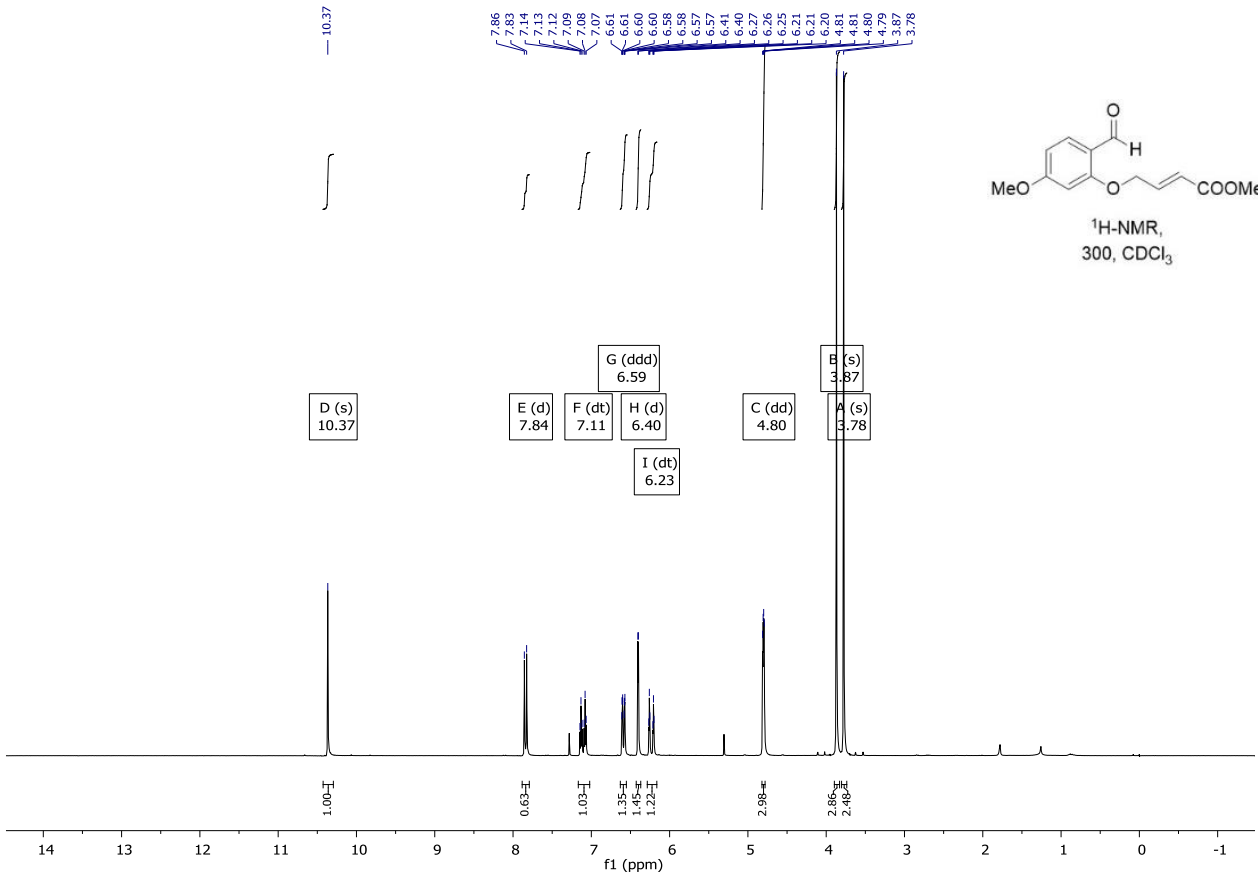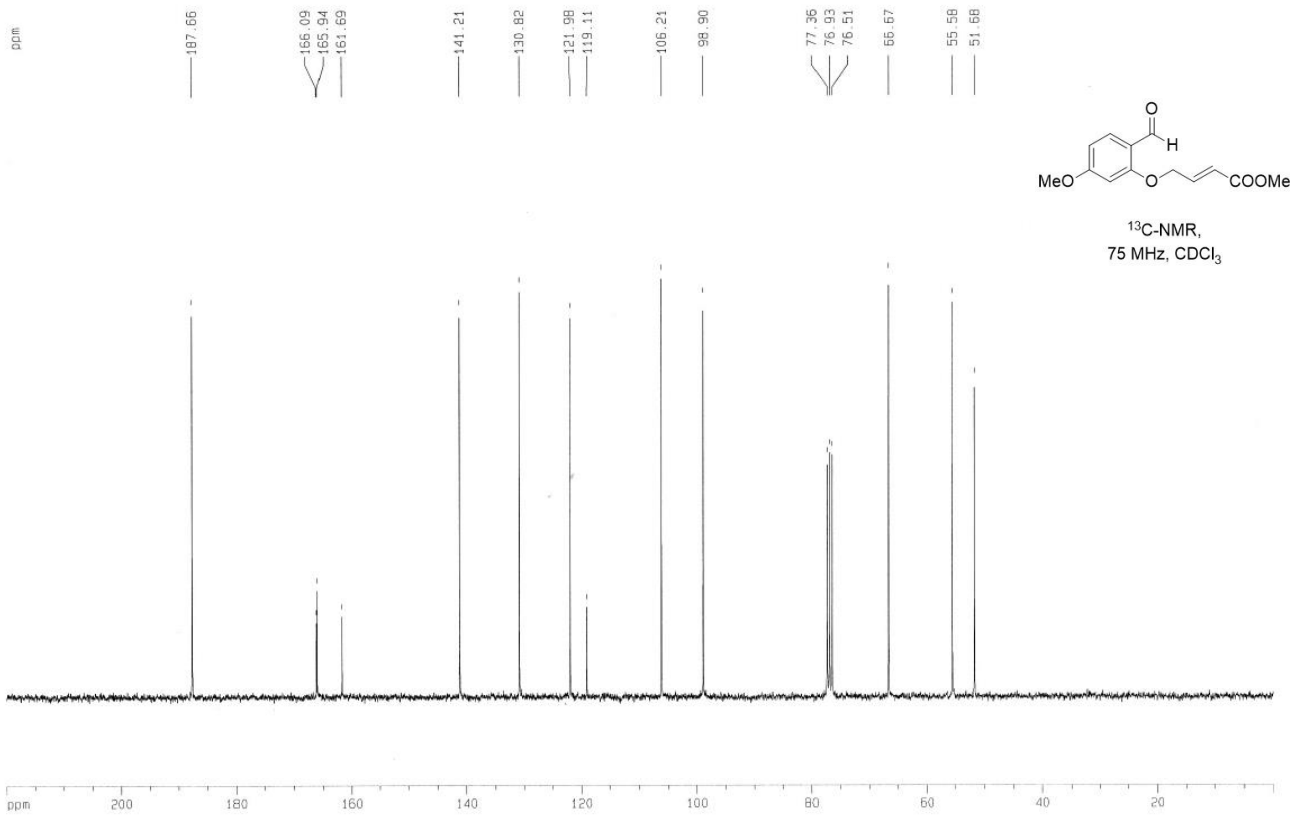

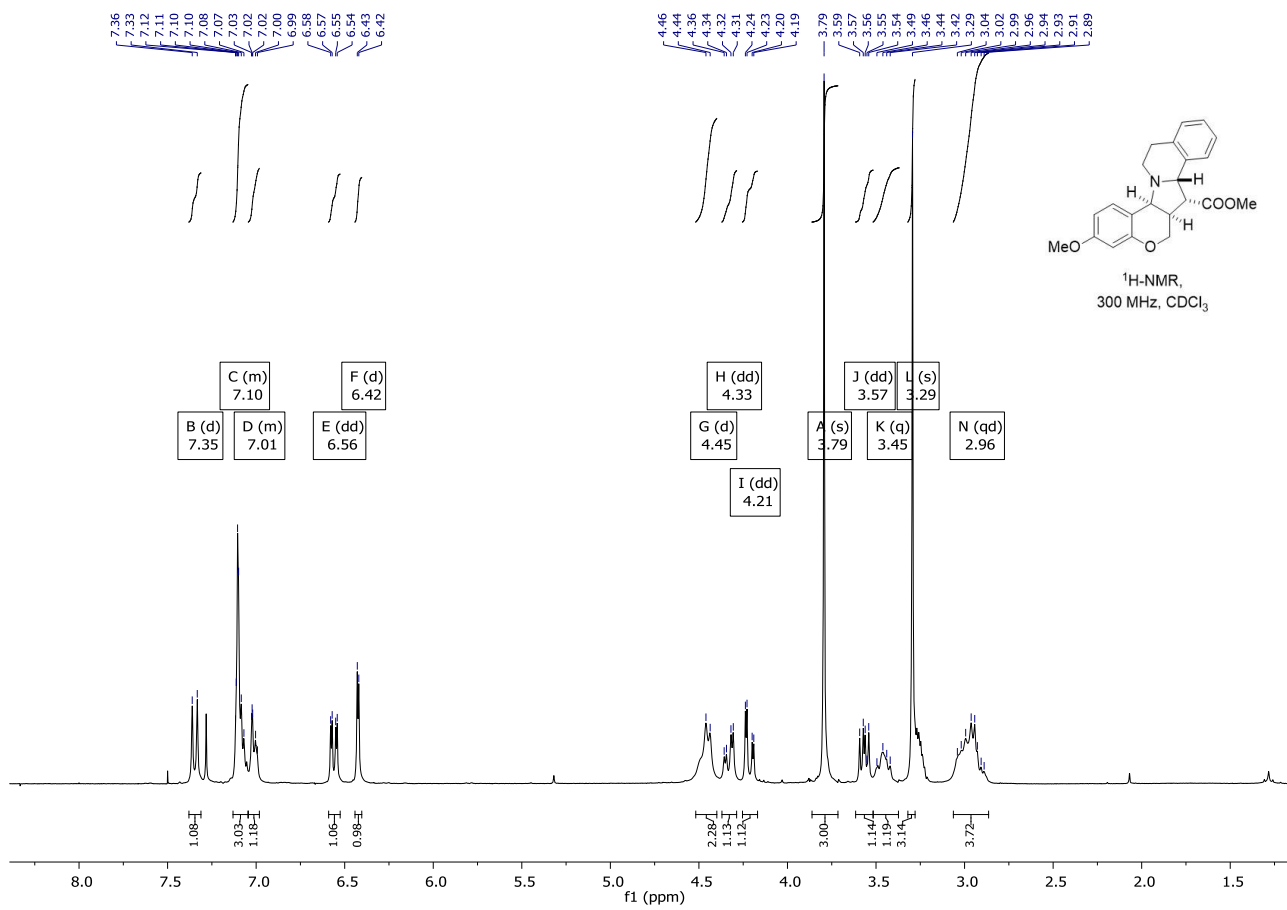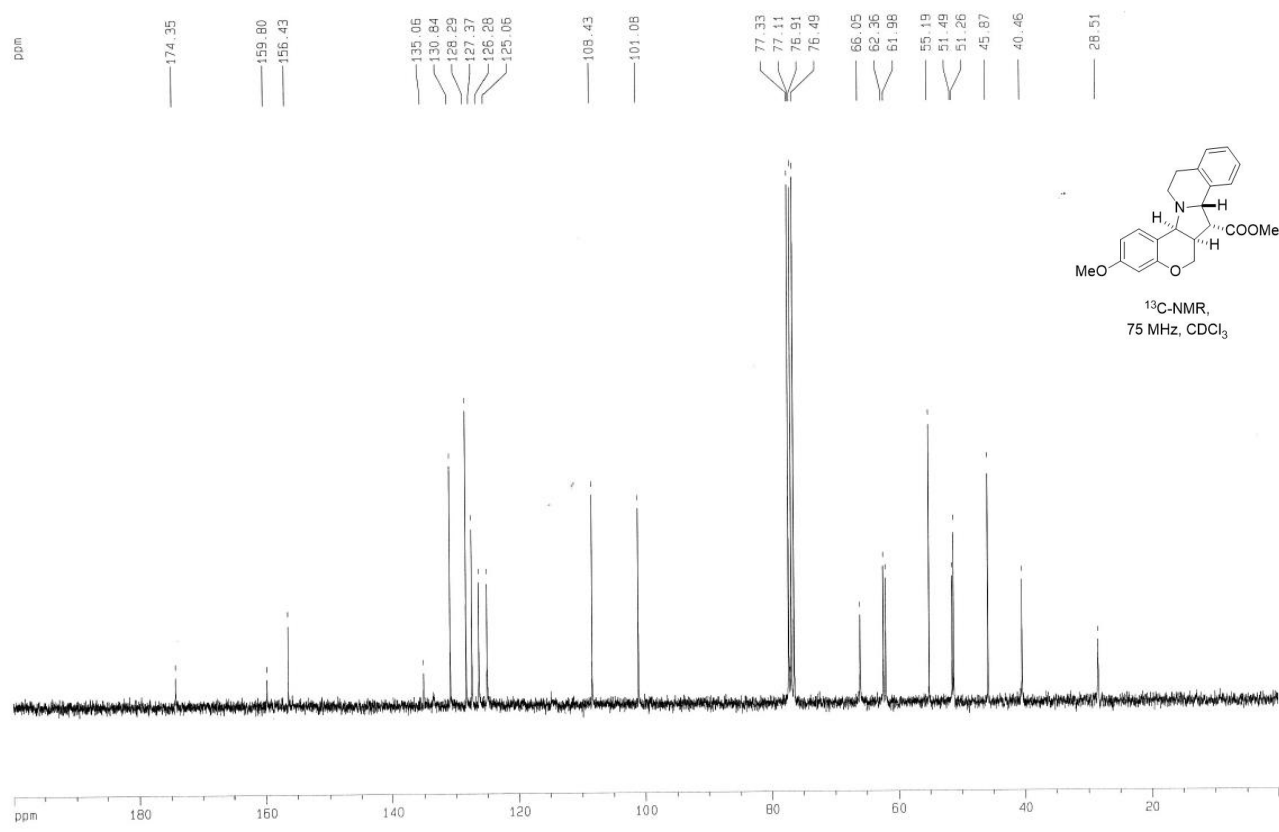

## 2. UV-Visible spectra of compounds PA1, PA2, 1 and 4a.

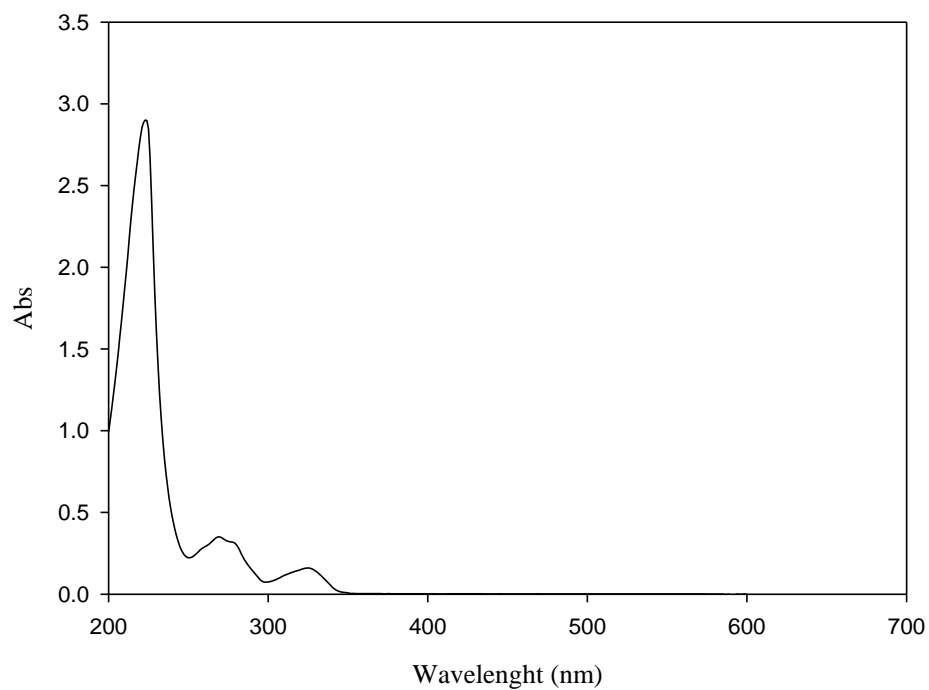

**Figure S1.** UV-Visible spectra of a solution  $10^{-4}$  M of 2-Naphtol (**PA1**) in Acetonitrile.

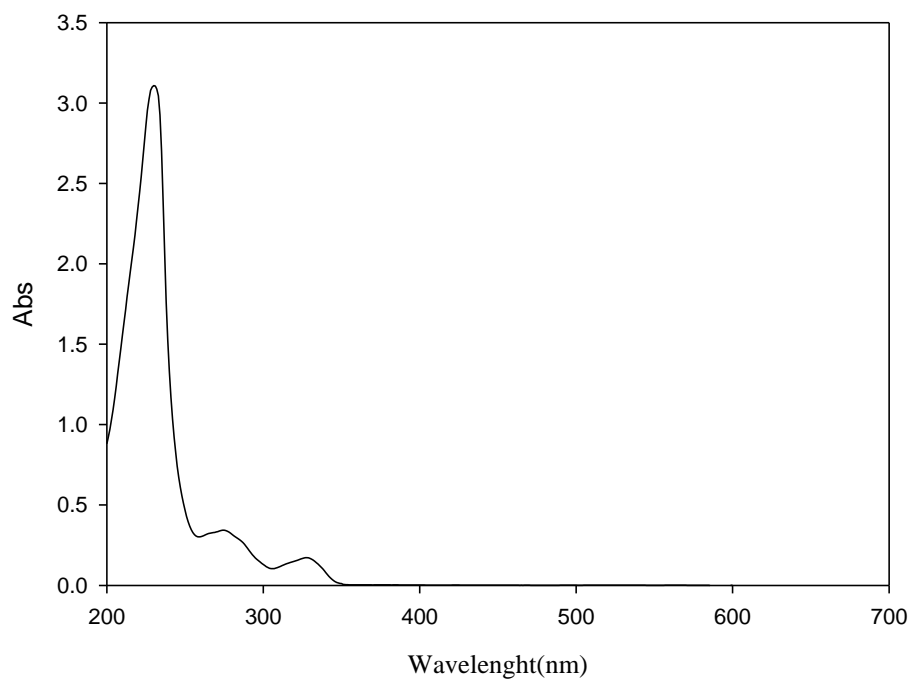

**Figure S2.** UV-Visible spectra of a solution  $10^{-4}$  M of 7-Bromo-2-naphtol in Acetonitrile

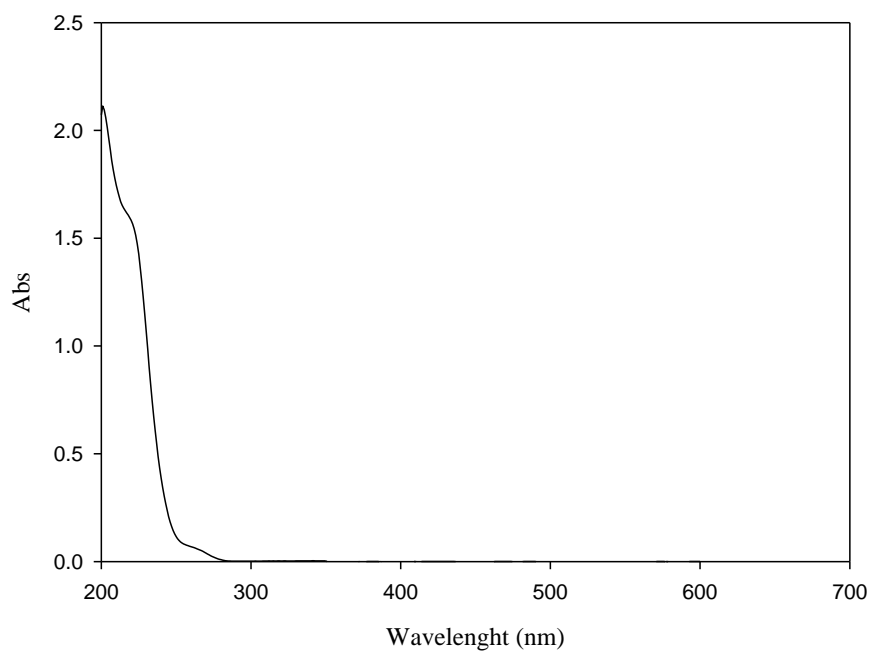

**Figure S3.** UV-Visible spectra of a solution  $10^{-4}$  M of Benzyl 2,2,2-trichloroacetimidate **1** in Acetonitrile

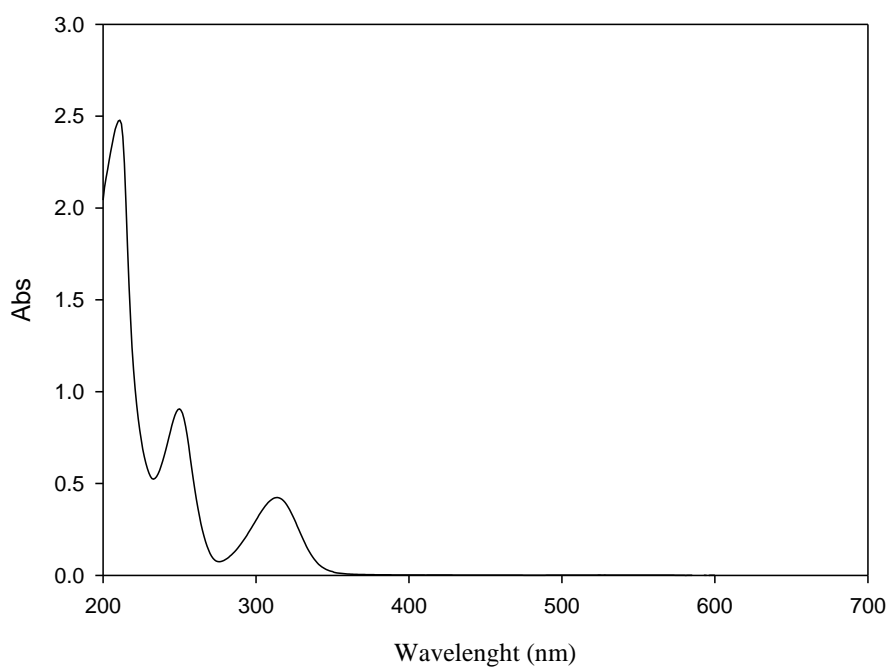

**Figure S4.** UV-Visible spectra of a solution  $10^{-4}$  M of (E)-methyl 4-(2-formylphenoxy)but-2-enoate **4a** in Acetonitrile



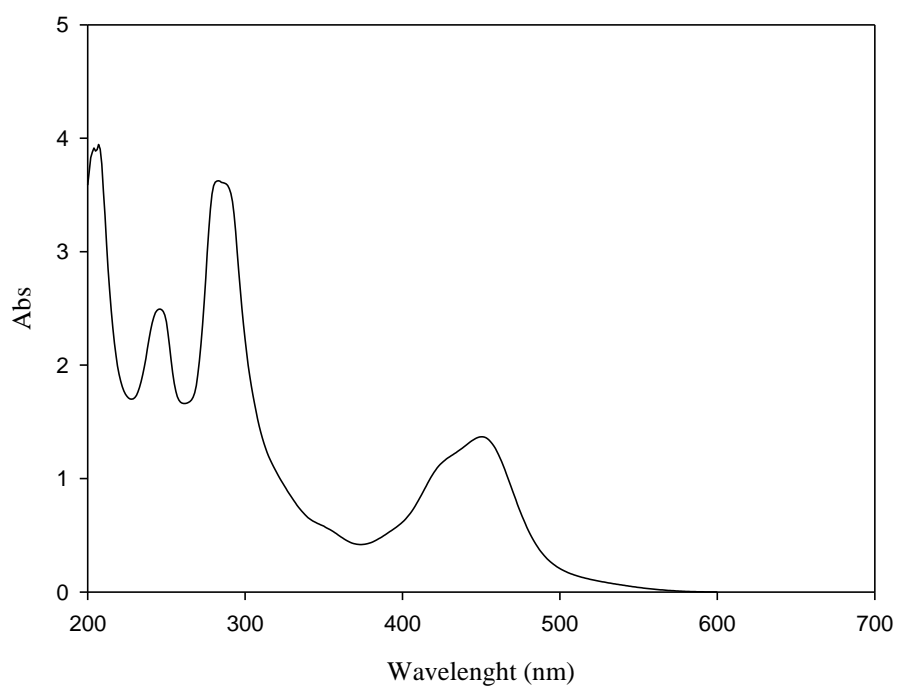

**Figure S5.** UV-Visible spectra of a solution  $10^{-4}$  M of Tris(2,2'-bipyridyl)dichlororuthenium(II) hexahydrate in Acetonitrile
